# Supplementary material for: Electronic Health Record Nudges and Health Care Quality and Outcomes in Primary Care: A Systematic Review
Source: PubMed Central journal article supplement (PMC11409160; doi:10.1001/jamanetworkopen.2024.32760), 2024-09-17
Supplement: jamanetwopen-e2432760-s001.pdf [file jamanetwopen-e2432760-s001.pdf]

## Supplemental Online Content

Nguyen OT, Kunta AR, Katoju S, et al. Electronic health record nudges and health care quality and outcomes in primary care: a systematic review. *JAMA Netw Open*. 2024;7(9):e2432760. doi:10.1001/jamanetworkopen.2024.32760

**eTable 1.** Search Strategy

**eTable 2.** Study Characteristics

**eTable 3.** Study Quality Assessment Results

This supplemental material has been provided by the authors to give readers additional information about their work.

**eTable 1.** Search strategy

| Database       | Terms                                                                                                                                                                                                                                                                                                                                                                                                                                                                                                                                                                                                                                            | Results |
|----------------|--------------------------------------------------------------------------------------------------------------------------------------------------------------------------------------------------------------------------------------------------------------------------------------------------------------------------------------------------------------------------------------------------------------------------------------------------------------------------------------------------------------------------------------------------------------------------------------------------------------------------------------------------|---------|
| MEDLINE/PubMed | MeSH Headings: (attending physicians, hospital OR osteopathic physicians OR internship and residency OR medical students OR primary care physicians OR medical staff OR physicians OR nursing OR nurses OR rehabilitation center OR allied health personnel OR allied health occupation OR physical therapy specialty OR occupational therapy OR speech therapy OR social work OR hospital chaplaincy service OR physician assistant) AND (((electronic health records[MeSH Terms:NoExp]) OR (medical record systems, computerized[MeSH Terms])) OR (clinical decision support systems[MeSH Terms]) OR (medical order entry system[MeSH Terms])) | 4,624   |

Keywords: ("intern" OR "interns" OR "internship" OR "resident" OR "residents" OR "residency" OR "residencies" OR trainee\* OR training OR fellow\* OR postdoc\* OR "post-doctoral" OR "post-doc\*" OR student\* OR hcp OR hcps OR "health care provider" OR "healthcare providers" OR clinician\* OR "general practitioner" OR "general practitioners" OR "primary care provider" OR "primary care providers" OR "PCP" OR "PCPs" OR internist\* OR "primary care physician" OR "primary care physicians" OR surge\* OR "general practice" OR "general practitioner" OR "general practitioners" OR "health care professional" OR "health care professionals" OR psychiatri\* OR hospitalist\* OR "internal medicine" OR internist\* OR cardiolog\* OR radiolog\* OR aneste\* OR anaesthe\* OR pediatric\* OR paediatric\* OR geriatric\* OR orthoped\* OR orthopaed\* OR ophthalmolog\* OR neurolog\* OR urolog\* OR pulmo\* OR oncolog\* OR otolaryngolog\* OR dermatolog\* OR otorhinolaryngolog\* OR gynecolog\* OR gynaecol\* OR obsteric\* OR gastroenterolog\* OR endocrinolog\* OR hepatolog\* OR hematolog\* OR neurosurge\* OR patholog\* OR rheumatolog\* OR immunolog\* OR "infectious disease" OR "infectious diseases" OR "communicable disease" OR "communicable diseases" OR nephrolog\* OR "emergency medicine" OR "medical examiner" OR "medical examiners" OR coroner\* OR osteopath\* OR endodont\* OR anatomist\* OR "behavioral health" OR "behavioural health" OR "mental health" OR "health care practitioner" OR "health care practitioners" OR "healthcare practitioner" OR "healthcare practitioners" OR "care practitioner" OR "care practitioners" OR "health practitioner" OR "health practitioners" OR "home health" OR "MD" OR "MDs" OR "DO" OR "DOs" OR "attending physician" OR prescriber\* OR "attending physicians" OR "physician" OR "physicians" OR doctor\* OR "Rehabilitation therapist" OR "rehabilitation therapists" OR "rehabilitation therapy" OR "allied health" OR "physical therapy" OR "physical therapist" OR "physical therapists" OR "occupational therapy" OR "occupational therapist" OR "occupational therapists" OR "speech therapy" OR "speech therapist" OR "speech therapists" OR "social work" OR "social worker" OR "social workers" OR "chaplain" OR "chaplains" OR "physician assistant" OR "physician assistants" OR "physician associate" OR "physician associates" OR "midlevel provider" OR "mid-level provider" OR "midlevel providers" OR "midlevel provider" OR "physician extender" OR "physician extenders" OR "Nursing student" OR "nursing students" OR nurse\* OR nursing OR midwi\* OR doula\* OR "registered nurse" OR "registered nurses" OR "licensed practical nurse" OR "licensed practical nurses" OR "licensed practical nursing" OR "nursing assistant" OR "birth assistant" OR "birth attendant" OR "nursing aide" OR "nursing aides" OR "geriatric aide" OR "advanced registered nurse practitioner" OR "advanced registered nurse practitioners" OR "advanced practice registered nurse" OR "advanced practice registered nurses" OR "RN" OR "RNs" OR "ARNP" OR "ARNPs" OR "LPN" OR "LPNs" OR "APRN" OR "APRNs" OR "nurse anesthetist" OR "nurse anesthetists" OR "advanced practice nurse" OR "advanced practice nurses" OR "advanced practice nursing" OR "cardiovascular nursing" OR "community health nursing" OR "critical care nursing" OR "emergency nursing" OR "critical care nursing" OR "emergency nursing" OR "ER nurse" OR "ER nurses" OR "ICU nurse" OR "ICU nurses" OR "ICU nursing" OR "family nursing" OR "forensic nursing" OR "geriatric nursing" OR "holistic nursing" OR "hospice nursing" OR "palliative care nursing" OR "maternal-child nursing" OR midwifery OR "military nursing" OR "nephrology nursing" OR "neuroscience nursing" OR "obstetric nursing" OR "occupational health nursing" OR "oncology nursing" OR "orthopedic nursing" OR "pediatric nursing" OR "perioperative nursing" OR "psychiatric nursing" OR "public health nursing" OR "radiologic nursing" OR "imaging nursing" OR "rehabilitation nursing" OR

"rural nursing" OR "school nursing" OR "transcultural nursing" OR "travelling nurse" OR "travel nurse") AND ("Choice architecture" OR default\* OR feedback OR "opt-in" OR "opt-out" OR "active choice" OR "active choices" OR "automated alert" OR "automated alerts" OR "automated reminder" OR "automated reminders" OR fire\* OR firing OR trigger\* OR template\* OR "structured documentation" OR SmartPhrase\* OR auto-fill\* OR autofill\* OR preload\* OR autopend\* OR unanswered OR "standing order" OR "standing orders" OR predetermin\* OR overrid\* OR "behavioral economic" OR "behavioral economics" OR "behavioral economist" OR "behavioral economists" OR nudge\*) AND (EHR OR EMR OR EHRs OR EMRs OR "electronic health record" OR "electronic health records" OR "electronic medical record" OR "electronic medical records" OR "computerized medical record" OR "computerized medical records" OR CDS OR "clinical decision support" OR CPOE OR "computerized physician order entry" OR "order entry" OR "computerized provider order entry" OR InBasket OR "In Basket" OR "patient messages" OR "patient-generated messages" OR "e-prescribing" OR "e-prescribe" OR "electronic prescription" OR "electronic prescriptions" OR "electronic prescribing") AND ("choice architecture" OR default\* OR feedback OR "opt-in" OR "opt-out" OR "active choice" OR "active choices" OR "automated alert" OR "automated alerts" OR "automated reminder" OR "automated reminders" OR fire\* OR firing OR trigger\* OR template\* OR "structured documentation" OR SmartPhrase\* OR auto-fill\* OR autofill\* OR preload\* OR autopend\* OR unanswered OR "standing order" OR "standing orders" OR predetermin\* OR overrid\* OR "behavioral economic" OR "behavioral economics" OR "behavioral economist" OR "behavioral economists" OR nudge\*)

Keywords: ("intern" OR "interns" OR "internship" OR "resident" OR "residents" OR "residency" OR "residencies" OR trainee\* OR training OR fellow\* OR postdoc\* OR "post-doctoral" OR "post-doc\*" OR student\* OR hcp OR hcps OR "health care provider" OR "healthcare providers" OR clinician\* OR "general practitioner" OR "general practitioners" OR "primary care provider" OR "primary care providers" OR "PCP" OR "PCPs" OR internist\* OR "primary care physician" OR "primary care physicians" OR surge\* OR "general practice" OR "general practitioner" OR "general practitioners" OR "health care professional" OR "health care professionals" OR psychiatri\* OR hospitalist\* OR "internal medicine" OR internist\* OR cardiolog\* OR radiolog\* OR aneste\* OR anaesthe\* OR pediatric\* OR paediatric\* OR geriatric\* OR orthoped\* OR orthopaed\* OR ophthalmolog\* OR neurolog\* OR urolog\* OR pulmo\* OR oncolog\* OR otolaryngolog\* OR dermatolog\* OR otorhinolaryngolog\* OR gynecolog\* OR gynaecolg\* OR obsteric\* OR gastroenterolog\* OR endocrinolog\* OR hepatolog\* OR hematolog\* OR neurosurge\* OR patholog\* OR rheumatolog\* OR immunolog\* OR "infectious disease" OR "infectious diseases" OR "communicable disease" OR "communicable diseases" OR nephrolog\* OR "emergency medicine" OR "medical examiner" OR "medical examiners" OR coroner\* OR osteopath\* OR endodont\* OR anatomist\* OR "behavioral health" OR "behavioural health" OR "mental health" OR "health care practitioner" OR "health care practitioners" OR "healthcare practitioner" OR "healthcare practitioners" OR "care practitioner" OR "care practitioners" OR "health practitioner" OR "health practitioners" OR "home health" OR "MD" OR "MDs" OR "DO" OR "DOs" OR "attending physician" OR prescriber\* OR "attending physicians" OR "physician" OR "physicians" OR doctor\* OR "Rehabilitation therapist" OR "rehabilitation therapists" OR "rehabilitation therapy" OR "allied health" OR "physical therapy" OR "physical therapist" OR "physical therapists" OR "occupational therapy" OR "occupational therapist" OR "occupational therapists" OR "speech therapy" OR "speech therapist" OR "speech therapists" OR "social work" OR "social worker" OR "social workers" OR "chaplain" OR "chaplains" OR "physician assistant" OR "physician assistants" OR "physician associate" OR "physician associates" OR "midlevel provider" OR "mid-level provider" OR "midlevel providers" OR "midlevel provider" OR "physician extender" OR "physician extenders" OR "Nursing student" OR "nursing students" OR nurse\* OR nursing OR midwi\* OR doula\* OR "registered nurse" OR "registered nurses" OR "licensed practical nurse" OR "licensed practical nurses" OR "licensed practical nursing" OR "nursing assistant" OR "birth assistant" OR "birth attendant" OR "nursing aide" OR "nursing aides" OR "geriatric aide" OR "advanced registered nurse practitioner" OR "advanced registered nurse practitioners" OR "advanced practice registered nurse" OR "advanced practice registered nurses" OR "RN" OR "RNs" OR "ARNP" OR "ARNPs" OR "LPN" OR "LPNs" OR "APRN" OR "APRNs" OR "nurse anesthetist" OR "nurse anesthetists" OR "advanced practice nurse" OR "advanced practice nurses" OR "advanced practice nursing" OR "cardiovascular nursing" OR "community health nursing" OR "critical care nursing" OR "emergency nursing" OR "critical care nursing" OR "emergency nursing" OR "ER nurse" OR "ER nurses" OR "ICU nurse" OR "ICU nurses" OR "ICU nursing" OR "family nursing" OR "forensic nursing" OR "geriatric nursing" OR "holistic nursing" OR "hospice nursing" OR "palliative care nursing" OR "maternal-child nursing" OR midwifery OR "military nursing" OR "nephrology nursing" OR "neuroscience nursing" OR "obstetric nursing" OR "occupational health nursing" OR "oncology nursing" OR "orthopedic nursing" OR "pediatric nursing" OR "perioperative nursing" OR "psychiatric nursing" OR "public health nursing" OR "radiologic nursing" OR "imaging nursing" OR "rehabilitation nursing" OR

"rural nursing" OR "school nursing" OR "transcultural nursing" OR "travelling nurse" OR "travel nurse") AND ("Choice architecture" OR default\* OR feedback OR "opt-in" OR "opt-out" OR "active choice" OR "active choices" OR "automated alert" OR "automated alerts" OR "automated reminder" OR "automated reminders" OR fire\* OR firing OR trigger\* OR template\* OR "structured documentation" OR SmartPhrase\* OR auto-fill\* OR autofill\* OR preload\* OR autopend\* OR unanswered OR "standing order" OR "standing orders" OR predetermin\* OR overrid\* OR "behavioral economic" OR "behavioral economics" OR "behavioral economist" OR "behavioral economists" OR nudge\*) AND (EHR OR EMR OR EHRs OR EMRs OR "electronic health record" OR "electronic health records" OR "electronic medical record" OR "electronic medical records" OR "computerized medical record" OR "computerized medical records" OR CDS OR "clinical decision support" OR CPOE OR "computerized physician order entry" OR "order entry" OR "computerized provider order entry" OR InBasket OR "In Basket" OR "patient messages" OR "patient-generated messages" OR "e-prescribing" OR "e-prescribe" OR "electronic prescription" OR "electronic prescriptions" OR "electronic prescribing") AND ("choice architecture" OR default\* OR feedback OR "opt-in" OR "opt-out" OR "active choice" OR "active choices" OR "automated alert" OR "automated alerts" OR "automated reminder" OR "automated reminders" OR fire\* OR firing OR trigger\* OR template\* OR "structured documentation" OR SmartPhrase\* OR auto-fill\* OR autofill\* OR preload\* OR autopend\* OR unanswered OR "standing order" OR "standing orders" OR predetermin\* OR overrid\* OR "behavioral economic" OR "behavioral economics" OR "behavioral economist" OR "behavioral economists" OR nudge\*)

Keywords: ("intern" OR "interns" OR "internship" OR "resident" OR "residents" OR "residency" OR "residencies" OR trainee\* OR training OR fellow\* OR postdoc\* OR "post-doctoral" OR "post-doc\*" OR student\* OR hcp OR hcps OR "health care provider" OR "healthcare providers" OR clinician\* OR "general practitioner" OR "general practitioners" OR "primary care provider" OR "primary care providers" OR "PCP" OR "PCPs" OR internist\* OR "primary care physician" OR "primary care physicians" OR surge\* OR "general practice" OR "general practitioner" OR "general practitioners" OR "health care professional" OR "health care professionals" OR psychiatri\* OR hospitalist\* OR "internal medicine" OR internist\* OR cardiolog\* OR radiolog\* OR aneste\* OR anaesthe\* OR pediatric\* OR paediatric\* OR geriatric\* OR orthoped\* OR orthopaed\* OR ophthalmolog\* OR neurolog\* OR urolog\* OR pulmo\* OR oncolog\* OR otolaryngolog\* OR dermatolog\* OR otorhinolaryngolog\* OR gynecolog\* OR gynaecol\* OR obsteric\* OR gastroenterolog\* OR endocrinolog\* OR hepatolog\* OR hematolog\* OR neurosurge\* OR patholog\* OR rheumatolog\* OR immunolog\* OR "infectious disease" OR "infectious diseases" OR "communicable disease" OR "communicable diseases" OR nephrolog\* OR "emergency medicine" OR "medical examiner" OR "medical examiners" OR coroner\* OR osteopath\* OR endodont\* OR anatomist\* OR "behavioral health" OR "behavioural health" OR "mental health" OR "health care practitioner" OR "health care practitioners" OR "healthcare practitioner" OR "healthcare practitioners" OR "care practitioner" OR "care practitioners" OR "health practitioner" OR "health practitioners" OR "home health" OR "MD" OR "MDs" OR "DO" OR "DOs" OR "attending physician" OR prescriber\* OR "attending physicians" OR "physician" OR "physicians" OR doctor\* OR "Rehabilitation therapist" OR "rehabilitation therapists" OR "rehabilitation therapy" OR "allied health" OR "physical therapy" OR "physical therapist" OR "physical therapists" OR "occupational therapy" OR "occupational therapist" OR "occupational therapists" OR "speech therapy" OR "speech therapist" OR "speech therapists" OR "social work" OR "social worker" OR "social workers" OR "chaplain" OR "chaplains" OR "physician assistant" OR "physician assistants" OR "physician associate" OR "physician associates" OR "midlevel provider" OR "mid-level provider" OR "midlevel providers" OR "midlevel provider" OR "physician extender" OR "physician extenders" OR "Nursing student" OR "nursing students" OR nurse\* OR nursing OR midwi\* OR doula\* OR "registered nurse" OR "registered nurses" OR "licensed practical nurse" OR "licensed practical nurses" OR "licensed practical nursing" OR "nursing assistant" OR "birth assistant" OR "birth attendant" OR "nursing aide" OR "nursing aides" OR "geriatric aide" OR "advanced registered nurse practitioner" OR "advanced registered nurse practitioners" OR "advanced practice registered nurse" OR "advanced practice registered nurses" OR "RN" OR "RNs" OR "ARNP" OR "ARNPs" OR "LPN" OR "LPNs" OR "APRN" OR "APRNs" OR "nurse anesthetist" OR "nurse anesthetists" OR "advanced practice nurse" OR "advanced practice nurses" OR "advanced practice nursing" OR "cardiovascular nursing" OR "community health nursing" OR "critical care nursing" OR "emergency nursing" OR "critical care nursing" OR "emergency nursing" OR "ER nurse" OR "ER nurses" OR "ICU nurse" OR "ICU nurses" OR "ICU nursing" OR "family nursing" OR "forensic nursing" OR "geriatric nursing" OR "holistic nursing" OR "hospice nursing" OR "palliative care nursing" OR "maternal-child nursing" OR midwifery OR "military nursing" OR "nephrology nursing" OR "neuroscience nursing" OR "obstetric nursing" OR "occupational health nursing" OR "oncology nursing" OR "orthopedic nursing" OR "pediatric nursing" OR "perioperative nursing" OR "psychiatric nursing" OR "public health nursing" OR "radiologic nursing" OR "imaging nursing" OR "rehabilitation nursing" OR

"rural nursing" OR "school nursing" OR "transcultural nursing" OR "travelling nurse" OR "travel nurse") AND  
"Choice architecture" OR default\* OR feedback OR "opt-in" OR "opt-out" OR "active choice" OR "active  
choices" OR "automated alert" OR "automated alerts" OR "automated reminder" OR "automated reminders"  
OR fire\* OR firing OR trigger\* OR template\* OR "structured documentation" OR SmartPhrase\* OR auto-fill\*  
OR autofill\* OR preload\* OR autopend\* OR unanswered OR "standing order" OR "standing orders" OR  
predetermin\* OR overrid\* OR "behavioral economic" OR "behavioral economics" OR "behavioral economist"  
OR "behavioral economists" OR nudge\*) AND (EHR OR EMR OR EHRs OR EMRs OR "electronic health  
record" OR "electronic health records" OR "electronic medical record" OR "electronic medical records" OR  
"computerized medical record" OR "computerized medical records" OR CDS OR "clinical decision support"  
OR CPOE OR "computerized physician order entry" OR "order entry" OR "computerized provider order entry"  
OR InBasket OR "In Basket" OR "patient messages" OR "patient-generated messages" OR "e-prescribing"  
OR "e-prescribe" OR "electronic prescription" OR "electronic prescriptions" OR "electronic prescribing") AND  
("choice architecture" OR default\* OR feedback OR "opt-in" OR "opt-out" OR "active choice" OR "active  
choices" OR "automated alert" OR "automated alerts" OR "automated reminder" OR "automated reminders"  
OR fire\* OR firing OR trigger\* OR template\* OR "structured documentation" OR SmartPhrase\* OR auto-fill\*  
OR autofill\* OR preload\* OR autopend\* OR unanswered OR "standing order" OR "standing orders" OR  
predetermin\* OR overrid\* OR "behavioral economic" OR "behavioral economics" OR "behavioral economist"  
OR "behavioral economists" OR nudge\*)



Keywords: ("intern" OR "interns" OR "internship" OR "resident" OR "residents" OR "residency" OR "residencies" OR trainee\* OR training OR fellow\* OR postdoc\* OR "post-doctoral" OR "post-doc\*" OR student\* OR hcp OR hcps OR "health care provider" OR "healthcare providers" OR clinician\* OR "general practitioner" OR "general practitioners" OR "primary care provider" OR "primary care providers" OR "PCP" OR "PCPs" OR internist\* OR "primary care physician" "primary care physicians" OR surge\* OR "general practice" OR "general practitioner" OR "general practitioners" OR "health care professional" OR "health care professionals" OR psychiatri\* OR hospitalist\* OR "internal medicine" OR internist\* OR cardiolog\* OR radiolog\* OR aneshe\* OR anaeshe\* OR pediatric\* OR paediatric\* OR geriatric\* OR orthoped\* OR orthopaed\* OR ophthalmolog\* OR neurolog\* OR urolog\* OR pulmo\* OR oncolog\* OR otolaryngolog\* OR dermatolog\* OR otorhinolaryngolog\* OR gynecolog\* OR gynaecol\* OR obsteric\* OR gastroenterolog\* OR endocrinolog\* OR hepatolog\* OR hematolog\* OR neurosurge\* OR patholog\* OR rheumatolog\* OR immunolog\* OR "infectious disease" OR "infectious diseases" OR "communicable disease" OR "communicable diseases" OR nephrolog\* OR "emergency medicine" OR "medical examiner" OR "medical examiners" OR coroner\* OR osteopath\* OR endodont\* OR anatomist\* OR "behavioral health" OR "behavioural health" OR "mental health" OR "health care practitioner" OR "health care practitioners" OR "healthcare practitioner" OR "healthcare practitioners" "care practitioner" OR "care practitioners" OR "health practitioner" OR "health practitioners" OR "home health" OR "MD" OR "MDs" OR "DO" OR "DOs" OR "attending physician" OR prescriber\* OR "attending physicians" OR "physician" OR "physicians" OR doctor\* OR "Rehabilitation therapist" OR "rehabilitation therapists" OR "rehabilitation therapy" OR "allied health" OR "physical therapy" OR "physical therapist" OR "physical therapists" OR "occupational therapy" OR "occupational therapist" OR "occupational therapists" OR "speech therapy" OR "speech therapist" OR "speech therapists" OR "social work" OR "social worker" OR "social workers" OR "chaplain" OR "chaplains" OR "physician assistant" OR "physician assistants" OR "physician associate" OR "physician associates" OR "midlevel provider" OR "mid-level provider" OR "midlevel providers" OR "midlevel provider" OR "physician extender" OR "physician extenders" OR "Nursing student" OR "nursing students" OR nurse\* OR nursing OR midwi\* OR doula\* OR "registered nurse" OR "registered nurses" OR "licensed practical nurse" OR "licensed practical nurses" OR "licensed practical nursing" OR "nursing assistant" OR "birth assistant" OR "birth attendant" OR "nursing aide" OR "nursing aides" OR "geriatric aide" OR "advanced registered nurse practitioner" OR "advanced registered nurse practitioners" OR "advanced practice registered nurse" OR "advanced practice registered nurses" OR "RN" OR "RNs" OR "ARNP" OR "ARNPs" OR "LPN" OR "LPNs" OR "APRN" OR "APRNs" OR "nurse anesthetist" OR "nurse anesthetists" OR "advanced practice nurse" OR "advanced practice nurses" OR "advanced practice nursing" OR "cardiovascular nursing" OR "community health nursing" OR "critical care nursing" OR "emergency nursing" OR "critical care nursing" OR "emergency nursing" OR "ER nurse" OR "ER nurses" OR "ICU nurse" OR "ICU nurses" OR "ICU nursing" OR "family nursing" OR "forensic nursing" OR "geriatric nursing" OR "holistic nursing" OR "hospice nursing" OR "palliative care nursing" OR "maternal-child nursing" OR midwifery OR "military nursing" OR "nephrology nursing" OR "neuroscience nursing" OR "obstetric nursing" OR "occupational health nursing" OR "oncology nursing" OR "orthopedic nursing" OR "pediatric nursing" OR "perioperative nursing" OR "psychiatric nursing" OR "public health nursing" OR "radiologic nursing" OR "imaging nursing" OR "rehabilitation nursing" OR

"rural nursing" OR "school nursing" OR "transcultural nursing" OR "travelling nurse" OR "travel nurse") AND ("Choice architecture" OR default\* OR feedback OR "opt-in" OR "opt-out" OR "active choice" OR "active choices" OR "automated alert" OR "automated alerts" OR "automated reminder" OR "automated reminders" OR fire\* OR firing OR trigger\* OR template\* OR "structured documentation" OR SmartPhrase\* OR auto-fill\* OR autofill\* OR preload\* OR autopend\* OR unanswered OR "standing order" OR "standing orders" OR predetermin\* OR overrid\* OR "behavioral economic" OR "behavioral economics" OR "behavioral economist" OR "behavioral economists" OR nudge\*) AND (EHR OR EMR OR EHRs OR EMRs OR "electronic health record" OR "electronic health records" OR "electronic medical record" OR "electronic medical records" OR "computerized medical record" OR "computerized medical records" OR CDS OR "clinical decision support" OR CPOE OR "computerized physician order entry" OR "order entry" OR "computerized provider order entry" OR InBasket OR "In Basket" OR "patient messages" OR "patient-generated messages" OR "e-prescribing" OR "e-prescribe" OR "electronic prescription" OR "electronic prescriptions" OR "electronic prescribing") AND ("choice architecture" OR default\* OR feedback OR "opt-in" OR "opt-out" OR "active choice" OR "active choices" OR "automated alert" OR "automated alerts" OR "automated reminder" OR "automated reminders" OR fire\* OR firing OR trigger\* OR template\* OR "structured documentation" OR SmartPhrase\* OR auto-fill\* OR autofill\* OR preload\* OR autopend\* OR unanswered OR "standing order" OR "standing orders" OR predetermin\* OR overrid\* OR "behavioral economic" OR "behavioral economics" OR "behavioral economist" OR "behavioral economists" OR nudge\*)

Keywords: ("intern" OR "interns" OR "internship" OR "resident" OR "residents" OR "residency" OR "residencies" OR trainee\* OR training OR fellow\* OR postdoc\* OR "post-doctoral" OR "post-doc\*" OR student\* OR hcp OR hcps OR "health care provider" OR "healthcare providers" OR clinician\* OR "general practitioner" OR "general practitioners" OR "primary care provider" OR "primary care providers" OR "PCP" OR "PCPs" OR internist\* OR "primary care physician" OR "primary care physicians" OR surge\* OR "general practice" OR "general practitioner" OR "general practitioners" OR "health care professional" OR "health care professionals" OR psychiatri\* OR hospitalist\* OR "internal medicine" OR internist\* OR cardiolog\* OR radiolog\* OR aneste\* OR anaesthe\* OR pediatric\* OR paediatric\* OR geriatric\* OR orthoped\* OR orthopaed\* OR ophthalmolog\* OR neurolog\* OR urolog\* OR pulmo\* OR oncolog\* OR otolaryngolog\* OR dermatolog\* OR otorhinolaryngolog\* OR gynecolog\* OR gynaecolg\* OR obsteric\* OR gastroenterolog\* OR endocrinolog\* OR hepatolog\* OR hematolog\* OR neurosurge\* OR patholog\* OR rheumatolog\* OR immunolog\* OR "infectious disease" OR "infectious diseases" OR "communicable disease" OR "communicable diseases" OR nephrolog\* OR "emergency medicine" OR "medical examiner" OR "medical examiners" OR coroner\* OR osteopath\* OR endodont\* OR anatomist\* OR "behavioral health" OR "behavioural health" OR "mental health" OR "health care practitioner" OR "health care practitioners" OR "healthcare practitioner" OR "healthcare practitioners" OR "care practitioner" OR "care practitioners" OR "health practitioner" OR "health practitioners" OR "home health" OR "MD" OR "MDs" OR "DO" OR "DOs" OR "attending physician" OR prescriber\* OR "attending physicians" OR "physician" OR "physicians" OR doctor\* OR "Rehabilitation therapist" OR "rehabilitation therapists" OR "rehabilitation therapy" OR "allied health" OR "physical therapy" OR "physical therapist" OR "physical therapists" OR "occupational therapy" OR "occupational therapist" OR "occupational therapists" OR "speech therapy" OR "speech therapist" OR "speech therapists" OR "social work" OR "social worker" OR "social workers" OR "chaplain" OR "chaplains" OR "physician assistant" OR "physician assistants" OR "physician associate" OR "physician associates" OR "midlevel provider" OR "mid-level provider" OR "midlevel providers" OR "midlevel provider" OR "physician extender" OR "physician extenders" OR "Nursing student" OR "nursing students" OR nurse\* OR nursing OR midwi\* OR doula\* OR "registered nurse" OR "registered nurses" OR "licensed practical nurse" OR "licensed practical nurses" OR "licensed practical nursing" OR "nursing assistant" OR "birth assistant" OR "birth attendant" OR "nursing aide" OR "nursing aides" OR "geriatric aide" OR "advanced registered nurse practitioner" OR "advanced registered nurse practitioners" OR "advanced practice registered nurse" OR "advanced practice registered nurses" OR "RN" OR "RNs" OR "ARNP" OR "ARNPs" OR "LPN" OR "LPNs" OR "APRN" OR "APRNs" OR "nurse anesthetist" OR "nurse anesthetists" OR "advanced practice nurse" OR "advanced practice nurses" OR "advanced practice nursing" OR "cardiovascular nursing" OR "community health nursing" OR "critical care nursing" OR "emergency nursing" OR "critical care nursing" OR "emergency nursing" OR "ER nurse" OR "ER nurses" OR "ICU nurse" OR "ICU nurses" OR "ICU nursing" OR "family nursing" OR "forensic nursing" OR "geriatric nursing" OR "holistic nursing" OR "hospice nursing" OR "palliative care nursing" OR "maternal-child nursing" OR midwifery OR "military nursing" OR "nephrology nursing" OR "neuroscience nursing" OR "obstetric nursing" OR "occupational health nursing" OR "oncology nursing" OR "orthopedic nursing" OR "pediatric nursing" OR "perioperative nursing" OR "psychiatric nursing" OR "public health nursing" OR "radiologic nursing" OR "imaging nursing" OR "rehabilitation nursing" OR

"rural nursing" OR "school nursing" OR "transcultural nursing" OR "travelling nurse" OR "travel nurse") AND ("Choice architecture" OR default\* OR feedback OR "opt-in" OR "opt-out" OR "active choice" OR "active choices" OR "automated alert" OR "automated alerts" OR "automated reminder" OR "automated reminders" OR fire\* OR firing OR trigger\* OR template\* OR "structured documentation" OR SmartPhrase\* OR auto-fill\* OR autofill\* OR preload\* OR autopend\* OR unanswered OR "standing order" OR "standing orders" OR predetermin\* OR overrid\* OR "behavioral economic" OR "behavioral economics" OR "behavioral economist" OR "behavioral economists" OR nudge\*) AND (EHR OR EMR OR EHRs OR EMRs OR "electronic health record" OR "electronic health records" OR "electronic medical record" OR "electronic medical records" OR "computerized medical record" OR "computerized medical records" OR CDS OR "clinical decision support" OR CPOE OR "computerized physician order entry" OR "order entry" OR "computerized provider order entry" OR InBasket OR "In Basket" OR "patient messages" OR "patient-generated messages" OR "e-prescribing" OR "e-prescribe" OR "electronic prescription" OR "electronic prescriptions" OR "electronic prescribing") AND ("choice architecture" OR default\* OR feedback OR "opt-in" OR "opt-out" OR "active choice" OR "active choices" OR "automated alert" OR "automated alerts" OR "automated reminder" OR "automated reminders" OR fire\* OR firing OR trigger\* OR template\* OR "structured documentation" OR SmartPhrase\* OR auto-fill\* OR autofill\* OR preload\* OR autopend\* OR unanswered OR "standing order" OR "standing orders" OR predetermin\* OR overrid\* OR "behavioral economic" OR "behavioral economics" OR "behavioral economist" OR "behavioral economists" OR nudge\*)

**eTable 2.** Study characteristics

| Study                 | Count  | Clinician Type     | Medical Conditions Studied | Length of Evaluation Period | Study Design | Sample Size                                                                                                                                  | Overall Nudge Intent        | Education Provided? (e.g., in-person, video, text, phone, email, screen shots) | Supporting Materials (e.g., notes, cards, emails, screen shots) | Positioning (e.g., in-clinic, home, office) | Audit and Feedback | Patient Education | Had Guidance? | Had Enabling? | Had Framing? | Had Provisional? | Electronic Health Records | Hardware | Had Temp? | Had Or? | Implementation Facilitators | Implementation Barriers |
|-----------------------|--------|--------------------|----------------------------|-----------------------------|--------------|----------------------------------------------------------------------------------------------------------------------------------------------|-----------------------------|--------------------------------------------------------------------------------|-----------------------------------------------------------------|---------------------------------------------|--------------------|-------------------|---------------|---------------|--------------|------------------|---------------------------|----------|-----------|---------|-----------------------------|-------------------------|
| McDowell et al., 1989 | Canada | Physicians, nurses | Hypertension screening     | 1 year                      | Parallel RCT | Letter reminder: 1,508 patients<br>Telephone reminder: 1,433 patients<br>Computerized reminder: 1,432 patients<br>Usual care: 1,371 patients | Increase behavior frequency | No                                                                             | No                                                              | No                                          | No                 | Yes               | No            | No            | No           | Yes              | Not reported              | Yes      | No        | No      | Not assessed                | Not assessed            |

|                                 |           |                     |                                                                 |                       |                 |                                                                                      |                                   |     |     |    |    |     |    |    |    |     |                     |     |    |    |                     |                          |
|---------------------------------|-----------|---------------------|-----------------------------------------------------------------|-----------------------|-----------------|--------------------------------------------------------------------------------------|-----------------------------------|-----|-----|----|----|-----|----|----|----|-----|---------------------|-----|----|----|---------------------|--------------------------|
| Flotto<br>rp et<br>al.,<br>2002 | Norway    | Not<br>report<br>ed | Urinary tract<br>infections,<br>pharyngitis                     | 4<br>months           | Cluster<br>RCT  | <u>Sore<br/>throat</u><br>56<br>intervention<br>clinics,<br>57<br>control<br>clinics | Increase<br>behavior<br>frequency | Yes | Yes | No | No | Yes | No | No | No | Yes | WinM<br>ed          | Yes | No | No | Not<br>assesse<br>d | Not<br>assessed          |
|                                 |           |                     |                                                                 |                       |                 | <u>UTI</u><br>57<br>intervention<br>clinics,<br>56<br>control<br>clinics             |                                   |     |     |    |    |     |    |    |    |     |                     |     |    |    |                     |                          |
| Tamb<br>lyn et<br>al.,<br>2003  | Canada    | Physi<br>cians      | Overprescrib<br>ing of<br>medications                           | 13<br>months          | Cluster<br>RCT  | 54<br>intervention<br>physicia<br>ns, 53<br>control<br>physicia<br>ns                | Decrease<br>behavior<br>frequency | No  | No  | No | No | No  | No | No | No | Yes | Not<br>report<br>ed | Yes | No | No | None<br>reported    | Compute<br>r<br>problems |
| Frank<br>et al.,<br>2004        | Australia | Physi<br>cians      | Multiple<br>preventive<br>screening<br>and<br>immunization<br>s | Not<br>applic<br>able | Parallel<br>RCT | Intervention<br>group<br>5118<br>patients;<br>control<br>group<br>5389<br>patients   | Increase<br>behavior<br>frequency | No  | No  | No | No | No  | No | No | No | Yes | Not<br>report<br>ed | Yes | No | No | Not<br>assesse<br>d | Not<br>assessed          |

|                      |               |            |                                   |          |              |                                                                                                        |                             |     |    |    |    |    |    |    |    |    |     |                                   |     |    |    |               |                                                                                                                                                                                                                        |
|----------------------|---------------|------------|-----------------------------------|----------|--------------|--------------------------------------------------------------------------------------------------------|-----------------------------|-----|----|----|----|----|----|----|----|----|-----|-----------------------------------|-----|----|----|---------------|------------------------------------------------------------------------------------------------------------------------------------------------------------------------------------------------------------------------|
| Sequist et al., 2005 | United States | Physicians | Diabetes, coronary artery disease | 6 months | Cluster RCT  | 92 physicians and 2,924 patients in intervention arm, 102 physicians and 3,319 patients in control arm | Increase behavior frequency | No  | No | No | No | No | No | No | No | No | Yes | LMR                               | Yes | No | No | None reported | Lack of time during visit, patient noncompliance or refusal of treatment ; lack of knowledge of specific guideline recommendation, lack of awareness of guideline's existence , disagree with guideline recommendation |
| Palen et al., 2006   | United States | Physicians | Laboratory values monitoring      | 1 year   | Parallel RCT | 207 physicians total: Alert condition: 103; Usual care condition: 104                                  | Increase behavior frequency | Yes | No | No | No | No | No | No | No | No | Yes | IBM - Clinical Information System | Yes | No | No | Not assessed  | Not assessed                                                                                                                                                                                                           |

|                        |                      |              |              |                  | physicians total |                                                                                                                                                                                                                                                                  |                             |    |    |    |    |    |    |    |    |     |              |     |     |    |              |              |
|------------------------|----------------------|--------------|--------------|------------------|------------------|------------------------------------------------------------------------------------------------------------------------------------------------------------------------------------------------------------------------------------------------------------------|-----------------------------|----|----|----|----|----|----|----|----|-----|--------------|-----|-----|----|--------------|--------------|
| Feldstein et al., 2006 | United States report | Not reported | Osteoporosis | 25 day follow-up | Parallel RCT     | 15 total clinics: 1) EHR alert group (4 clinics, 44 clinicians, 196 patients) ; 2) voice mail group (3 clinics, 44 clinicians, 267 patients) ; 3) pharmacy team outreach (4 clinics, 56 clinicians, 261 patients) ; 4) Usual care group (4 clinics, 56 clinician | Increase behavior frequency | No | No | No | No | No | No | No | No | Yes | Not reported | Yes | Yes | No | Not assessed | Not assessed |



|                      |                    |             |              |                    |              |                                                                                                                                                                                                                                                     |                                |    |    |    |    |    |    |    |    |     |               |      |    |    |               |              |
|----------------------|--------------------|-------------|--------------|--------------------|--------------|-----------------------------------------------------------------------------------------------------------------------------------------------------------------------------------------------------------------------------------------------------|--------------------------------|----|----|----|----|----|----|----|----|-----|---------------|------|----|----|---------------|--------------|
| van Wyk et al., 2008 | Nethe rlands cians | Physi cians | Dyslipidemia | 12 month follow-up | Clust er RCT | Total: 38 practice s; 1) Alert conditio n (13 practice s; 26 physicia ns; 31211 patients) ; 2) On-demand support conditio n (14 practice s; 34 physicia ns; 29518 patients) ; 3) Control conditio n (11 practice s; 20 physicia ns; 31325 patients) | Incre ase beha vior frequ ency | No | No | No | No | No | No | No | No | Yes | ELIAS syste m | Ye s | No | No | Not asse ssed | Not assessed |
|----------------------|--------------------|-------------|--------------|--------------------|--------------|-----------------------------------------------------------------------------------------------------------------------------------------------------------------------------------------------------------------------------------------------------|--------------------------------|----|----|----|----|----|----|----|----|-----|---------------|------|----|----|---------------|--------------|

|                     |               |                              |                              |                |             |                                                                                                                       |                             |    |    |    |    |     |    |    |    |     |            |                             |     |     |              |              |              |
|---------------------|---------------|------------------------------|------------------------------|----------------|-------------|-----------------------------------------------------------------------------------------------------------------------|-----------------------------|----|----|----|----|-----|----|----|----|-----|------------|-----------------------------|-----|-----|--------------|--------------|--------------|
| Lo et al., 2009     | United States | Physicians, NPs, PAs, nurses | Laboratory values monitoring | Not applicable | Cluster RCT | Control: 191 providers and 1520 patients; intervention: 175 providers and 1245 patients                               | Increase behavior frequency | No | No | No | No | No  | No | No | No | No  | Yes        | Longitudinal Medical Record | Yes | No  | No           | Not assessed | Not assessed |
| Gill et al., 2009   | United States | Physicians                   | Lipids monitoring            | 1 year         | Cluster RCT | 12 offices intervention arm (26,996 patients, 49 physicians), 13 offices control arm (37,454 patients, 56 physicians) | Increase behavior frequency | No | No | No | No | Yes | No | No | No | Yes | Centricity | Yes                         | Yes | Yes | Not assessed | Not assessed |              |
| Linder et al., 2009 | United States | Physicians, PAs, NPs         | Smoking cessation            | 9 months       | Cluster RCT | 14 practices, 314 clinicians, and 68,309 patients in                                                                  | Increase behavior frequency | No | No | No | No | No  | No | No | No | Yes | LMR        | Yes                         | No  | Yes | Not assessed | Not assessed |              |

control  
arm and  
12  
practice  
s,  
64,321  
patients,  
and 207  
clinician  
s in  
intervent  
ion arm

|                                |                             |                                                   |        |                    |                                                 |                                           |     |     |    |    |    |    |     |    |     |      |         |     |         |                        |                     |
|--------------------------------|-----------------------------|---------------------------------------------------|--------|--------------------|-------------------------------------------------|-------------------------------------------|-----|-----|----|----|----|----|-----|----|-----|------|---------|-----|---------|------------------------|---------------------|
| Fortu<br>na et<br>al.,<br>2009 | United States<br>Physicians | Overprescrib<br>ing of<br>hypnotic<br>medications | 1 year | Clust<br>er<br>RCT | 14<br>internal<br>medicin<br>e<br>practice<br>s | Decrease<br>beha<br>vior<br>frequ<br>ency | Yes | Yes | No | No | No | No | Yes | No | Yes | Epic | Ye<br>s | Yes | Ye<br>s | Not<br>asse<br>s<br>ed | Not<br>assess<br>ed |
|--------------------------------|-----------------------------|---------------------------------------------------|--------|--------------------|-------------------------------------------------|-------------------------------------------|-----|-----|----|----|----|----|-----|----|-----|------|---------|-----|---------|------------------------|---------------------|

5 sites  
(80  
clinician  
s)  
assigne  
d to  
receiv  
e  
only  
alerts

4 sites  
(115  
clinician  
s)  
assigne  
d to  
receiv  
e  
both  
alerts

and  
educatio  
nal  
sessions  
)

5 sites  
(62  
clinician  
s)  
assigne  
d to  
usual  
care

|                        |               |              |                         |          |             |                                                                                                                             |                             |     |     |    |    |    |    |    |    |    |     |              |     |    |    |              |              |
|------------------------|---------------|--------------|-------------------------|----------|-------------|-----------------------------------------------------------------------------------------------------------------------------|-----------------------------|-----|-----|----|----|----|----|----|----|----|-----|--------------|-----|----|----|--------------|--------------|
| Schriefer et al., 2009 | United States | Physicians   | Obesity                 | Unclear  | Cluster RCT | 2 teams, 18 physicians, 379 patients were in intervention arm, 2 teams, 19 physicians, and 467 patients were in control arm | Increase behavior frequency | No  | No  | No | No | No | No | No | No | No | Yes | Not reported | Yes | No | No | Not assessed | Not assessed |
| Fiks et al., 2009      | United States | Not reported | Influenza immunizations | 6 months | Cluster RCT | 5,809 patients in control arm, 6,110                                                                                        | Increase behavior frequency | Yes | Yes | No | No | No | No | No | No | No | Yes | Epic         | Yes | No | No | Not assessed | Not assessed |

|                      |               |                      |                                          |                | patients<br>in<br>intervention arm |                                                                                                                                               |                             |     |     |    |    |     |    |     |     |     |                             |     |     |     |              |              |
|----------------------|---------------|----------------------|------------------------------------------|----------------|------------------------------------|-----------------------------------------------------------------------------------------------------------------------------------------------|-----------------------------|-----|-----|----|----|-----|----|-----|-----|-----|-----------------------------|-----|-----|-----|--------------|--------------|
| Co et al., 2010      | United States | Physicians           | Attention-deficit/hyperactivity disorder | Not applicable | Cluster RCT                        | 412 patients total: Intervention: 206 patients; control: 206 patients; each group included 3 community health centers and 3 private practices | Increase behavior frequency | Yes | Yes | No | No | No  | No | No  | Yes | Yes | Longitudinal Medical Record | Yes | Yes | No  | Not assessed | Not assessed |
| Playe r et al., 2010 | United States | Physicians, PAs, NPs | Gastroesophageal reflux disease          | 1 year         | Cluster RCT                        | 13 offices with 53 providers were randomized to the intervention group, and 14                                                                | Increase behavior frequency | Yes | Yes | No | No | Yes | No | Yes | No  | Yes | Community                   | No  | Yes | Yes | Not assessed | Not assessed |

offices with 66 providers were randomized to the control group.

|                   |               |                      |                                                                                       |           |             |                                                                                                       |                                                          |     |     |    |    |    |    |     |    |     |              |     |     |     |              |                    |
|-------------------|---------------|----------------------|---------------------------------------------------------------------------------------|-----------|-------------|-------------------------------------------------------------------------------------------------------|----------------------------------------------------------|-----|-----|----|----|----|----|-----|----|-----|--------------|-----|-----|-----|--------------|--------------------|
| Bell et al., 2010 | United States | Physicians           | Asthma                                                                                | 1 year    | Cluster RCT | Control- 9035 Intervention- 10415 Total= 19450                                                        | Increase behavior frequency                              | Yes | No  | No | No | No | No | No  | No | Yes | Epic         | Yes | Yes | Yes | Not assessed | Not assessed       |
| Gill et al., 2011 | United States | Physicians, NPs, PAs | Gastrointestinal monitoring for patients taking non-steroidal anti-inflammatory drugs | 1 year    | Cluster RCT | 53 clinicians and 2,222 patients in intervention arm, 66 clinicians and 3,012 patients in control arm | Increase behavior frequency, decrease behavior frequency | Yes | Yes | No | No | No | No | No  | No | Yes | Centricity   | Yes | Yes | Yes | Not reported | Took too much time |
| O'Connor et       | United States | Physicians           | Diabetes                                                                              | 21 months | Cluster RCT | 6 clinics, 20 physicians,                                                                             | Increase behavior                                        | Yes | No  | No | No | No | No | Yes | No | Yes | Not reported | No  | No  | No  | Not assessed | Not assessed       |

|                          |               |            |                                                                                          |           |                                                                                             |                                                                                                   |                                                          |     |    |    |    |    |    |    |     |              |     |    |     |              |              |
|--------------------------|---------------|------------|------------------------------------------------------------------------------------------|-----------|---------------------------------------------------------------------------------------------|---------------------------------------------------------------------------------------------------|----------------------------------------------------------|-----|----|----|----|----|----|----|-----|--------------|-----|----|-----|--------------|--------------|
| al.,<br>2011             |               |            |                                                                                          |           | 1,194 patients in intervention arm; 5 clinics, 20 physicians, 1,362 patients in control arm | frequency                                                                                         |                                                          |     |    |    |    |    |    |    |     |              |     |    |     |              |              |
| Abdel-Kader et al., 2011 | United States | Physicians | Chronic kidney disease                                                                   | 1 year    | Parallel RCT                                                                                | 103 patients and 15 physicians in control arm, 145 patients and 15 physicians in intervention arm | Increase behavior frequency, decrease behavior frequency | Yes | No | No | No | No | No | No | Yes | Epic         | Yes | No | Yes | Not assessed | Not assessed |
| Loo et al., 2011         | United States | Physicians | Pneumococcal immunizations, influenza immunizations, osteoporosis screening, designation | 12 months | Parallel RCT                                                                                | 17 physicians and 1,336 patients received only EMR reminders, 17                                  | Increase behavior frequency                              | No  | No | No | No | No | No | No | Yes | Not reported | Yes | No | No  | Not assessed | Not assessed |

|                    |                |                        |                             |          |             |                                                                                                                           |                             |     |     |     |     |    |    |    |     |     |              |     |     |     |              |                                                                                         |
|--------------------|----------------|------------------------|-----------------------------|----------|-------------|---------------------------------------------------------------------------------------------------------------------------|-----------------------------|-----|-----|-----|-----|----|----|----|-----|-----|--------------|-----|-----|-----|--------------|-----------------------------------------------------------------------------------------|
|                    |                | of a health care proxy |                             |          |             | physicians and 1,394 patients received EMR reminders and panel management, 20 physicians and 1,930 patients in usual care |                             |     |     |     |     |    |    |    |     |     |              |     |     |     |              |                                                                                         |
| Feder et al., 2011 | United Kingdom | Not reported           | Domestic violence screening | 1 year   | Cluster RCT | 24 intervention clinics, 24 control clinics                                                                               | Increase behavior frequency | Yes | Yes | Yes | Yes | No | No | No | No  | Yes | Not reported | No  | Yes | No  | Not assessed | Not assessed                                                                            |
| Tang et al., 2012  | United States  | Physicians             | Weight management           | 6 months | Cluster RCT | 15 physician control physicians. 200 randomly selected patients                                                           | Increase behavior frequency | Yes | No  | No  | No  | No | No | No | Yes | Yes | Epic         | Yes | Yes | Yes | Not reported | Insufficient time in clinic, tool complexity, patient disinterest, personal disinterest |



|                      |               |                      |                                       |                   |                                                                                                                                |                             |     |    |    |    |    |    |     |    |     |       |     |    |    |              |              |
|----------------------|---------------|----------------------|---------------------------------------|-------------------|--------------------------------------------------------------------------------------------------------------------------------|-----------------------------|-----|----|----|----|----|----|-----|----|-----|-------|-----|----|----|--------------|--------------|
| Tamblyn et al., 2012 | Canada        | Physicians           | Overprescribing of psychotropic drugs | Cluster RCT       | 81 physicians and 5628 patients total; intervention: 41 physicians and 2887 patients; control: 40 physicians and 2741 patients | Decrease behavior frequency | Yes | No | No | No | No | No | No  | No | Yes | MOXXI | Yes | No | No | Not assessed | Not assessed |
| Sequist et al., 2012 | United States | Physicians, PAs, NPs | Chest pain                            | 2-month follow-up | Parallel RCT intervention group (149 clinicians; 3634 patients); control group (143 clinicians, 3449 patients)                 | Increase behavior frequency | Yes | No | No | No | No | No | Yes | No | Yes | Epic  | Yes | No | No | Not assessed | Not assessed |

|                     |               |              |                                                                                                                                                                                                                                                                             |          |             |                                                                                                   |                             |     |    |    |    |    |    |     |    |    |     |              |     |    |    |              |              |
|---------------------|---------------|--------------|-----------------------------------------------------------------------------------------------------------------------------------------------------------------------------------------------------------------------------------------------------------------------------|----------|-------------|---------------------------------------------------------------------------------------------------|-----------------------------|-----|----|----|----|----|----|-----|----|----|-----|--------------|-----|----|----|--------------|--------------|
| Wright et al., 2012 | United States | Not reported | ADHD, asthma/COPD, breast cancer, CAD, congenital coagulopathy, CHF, diabetes mellitus, glaucoma, hypertension, hyperthyroidism, hypothyroidism, myasthenia gravis, osteoporosis/osteopenia, rheumatoid arthritis, renal failure/insufficiency, sickle cell disease, stroke | 6 months | Cluster RCT | 14 clinics and 38,025 patients in intervention arm, 14 clinics and 41,039 patients in control arm | Increase behavior frequency | No  | No | No | No | No | No | Yes | No | No | Yes | LMR          | Yes | No | No | Not assessed | Not assessed |
| Høye et al., 2013   | Norway        | Not reported | Upper respiratory infections                                                                                                                                                                                                                                                | One year | Cluster RCT | 40 groups of clinicians in intervention arm, 41 groups in control arm. Together                   | Decrease behavior frequency | Yes | No | No | No | No | No | Yes | No | No | No  | Not reported | Yes | No | No | Not assessed | Not assessed |

r, there  
were  
328 GPs

156 GPs  
in  
intervention  
groups  
172 GPs  
in  
Control

|                         |                                                                         |                          |                |                                                                                                                                                                                                                                                                           |                                   |     |    |    |     |    |    |    |    |     |      |     |    |    |                 |                 |
|-------------------------|-------------------------------------------------------------------------|--------------------------|----------------|---------------------------------------------------------------------------------------------------------------------------------------------------------------------------------------------------------------------------------------------------------------------------|-----------------------------------|-----|----|----|-----|----|----|----|----|-----|------|-----|----|----|-----------------|-----------------|
| Fiks<br>et al.,<br>2013 | United States<br>Physicians<br>Human<br>papillomavirus<br>immunizations | 12<br>month<br>follow-up | Cluster<br>RCT | 22<br>practice<br>sites total:<br>1) clinician<br>focused<br>intervention<br>only<br>(4495<br>families)<br>; 2)<br>family<br>focused<br>intervention<br>only<br>(5714<br>families)<br>; 3)<br>clinician<br>and<br>family<br>focused<br>intervention<br>(5593<br>families) | Increase<br>behavior<br>frequency | Yes | No | No | Yes | No | No | No | No | Yes | Epic | Yes | No | No | Not<br>assessed | Not<br>assessed |
|-------------------------|-------------------------------------------------------------------------|--------------------------|----------------|---------------------------------------------------------------------------------------------------------------------------------------------------------------------------------------------------------------------------------------------------------------------------|-----------------------------------|-----|----|----|-----|----|----|----|----|-----|------|-----|----|----|-----------------|-----------------|



|                        |               |                        |                              |                    |               |                                                                                                                      |                             |     |    |    |     |    |    |    |     |     |              |                    |     |     |              |                                                                                                                 |              |
|------------------------|---------------|------------------------|------------------------------|--------------------|---------------|----------------------------------------------------------------------------------------------------------------------|-----------------------------|-----|----|----|-----|----|----|----|-----|-----|--------------|--------------------|-----|-----|--------------|-----------------------------------------------------------------------------------------------------------------|--------------|
| Stockwell et al., 2015 | United States | Physician, NPs, nurses | Influenza immunizations      | 1 year             | Crossover RCT | 6593 patients                                                                                                        | Increase behavior frequency | Yes | No | No | No  | No | No | No | Yes | No  | Yes          | Allscripts Sunrise | Yes | No  | No           | Not assessed                                                                                                    | Not assessed |
| Szilagi et al., 2015   | United States | Physicians, nurses     | Pediatric immunizations      | 1 year             | Cluster RCT   | 11 clinics in control arm, 11 clinics in intervention arm                                                            | Increase behavior frequency | Yes | No | No | No  | No | No | No | No  | Yes | Not reported | Yes                | No  | No  | Not reported | Lack of time, errors in how prompts are fired, lack of complete intervention acceptance by clinicians and staff |              |
| Meeker et al., 2016    | United States | Physicians             | Upper respiratory infections | 18 month follow-up | Cluster RCT   | Total: 49 practices; 6 practices; 27 clinicians (control condition); 6 practices; 42 clinicians (suggested alternati | Decrease behavior frequency | No  | No | No | Yes | No | No | No | Yes | Yes | Mixed        | No                 | No  | Yes | Not assessed | Not assessed                                                                                                    |              |

ves  
 conditio  
 n); 7  
 practice  
 s; 35  
 clinician  
 s  
 (account  
 able  
 justificati  
 on  
 conditio  
 n); 4  
 practice  
 s; 24  
 clinician  
 s (peer  
 compari  
 son  
 conditio  
 n)

|                        |       |                    |                             |        |              |                                                                                           |                             |    |    |    |    |    |    |    |    |     |              |     |    |    |              |              |
|------------------------|-------|--------------------|-----------------------------|--------|--------------|-------------------------------------------------------------------------------------------|-----------------------------|----|----|----|----|----|----|----|----|-----|--------------|-----|----|----|--------------|--------------|
| Guiriguet et al., 2016 | Spain | Physicians, nurses | Colorectal cancer screening | 1 year | Parallel RCT | 67 GPs and 21,619 patients in intervention arm, 63 GPs and 19,423 patients in control arm | Increase behavior frequency | No | No | No | No | No | No | No | No | Yes | Not reported | Yes | No | No | Not assessed | Not assessed |
|------------------------|-------|--------------------|-----------------------------|--------|--------------|-------------------------------------------------------------------------------------------|-----------------------------|----|----|----|----|----|----|----|----|-----|--------------|-----|----|----|--------------|--------------|

|                       |               |                                |                           |           |             |                                                                                                                                                                  |                             |     |    |    |    |     |    |     |     |        |      |              |     |              |              |              |              |
|-----------------------|---------------|--------------------------------|---------------------------|-----------|-------------|------------------------------------------------------------------------------------------------------------------------------------------------------------------|-----------------------------|-----|----|----|----|-----|----|-----|-----|--------|------|--------------|-----|--------------|--------------|--------------|--------------|
| Kressin et al., 2016  | United States | Physicians                     | Hypertension              | 1 year    | Cluster RCT | 8866 patients, sample size per group not reported                                                                                                                | Increase behavior frequency | Yes | No | No | No | No  | No | No  | Yes | Yes    | Yes  | Not reported | Yes | No           | No           | Not assessed | Not assessed |
| Federman et al., 2017 | United States | Physicians, medical assistants | Hepatitis C Virus testing | 11 months | Cluster RCT | 82 clinicians in intervention arm and 45 clinicians were in control arm. There were also 14,825 patients in intervention arm and 10,795 patients in control arm. | Increase behavior frequency | Yes | No | No | No | Yes | No | Yes | Yes | Yes    | Epic | Yes          | No  | Yes          | Not assessed | Not assessed |              |
| Kharbanda             | United States | Physicians, nurses             | Hypertension              | 90-days   | Cluster RCT | 20 practice sites total: intervention                                                                                                                            | Increase behavior           | Yes | No | No | No | No  | No | No  | Yes | TeenBP | Yes  | No           | Yes | Not assessed | Not assessed |              |              |

|                          |               |              |                        |        |              |                                                                                                       |                             |     |     |    |    |     |    |     |     |      |                            |     |    |              |              |              |
|--------------------------|---------------|--------------|------------------------|--------|--------------|-------------------------------------------------------------------------------------------------------|-----------------------------|-----|-----|----|----|-----|----|-----|-----|------|----------------------------|-----|----|--------------|--------------|--------------|
| et al.,<br>2018          |               |              |                        |        |              | ion: 607<br>patients,<br>control:<br>607<br>patients                                                  |                             |     |     |    |    |     |    |     |     |      |                            |     |    |              |              |              |
| Karlsson et al.,<br>2018 | Sweden        | Physicians   | Atrial fibrillation    | 1 year | Cluster RCT  | 22 clinics in intervention, 21 clinics in usual care                                                  | Increase behavior frequency | Yes | Yes | No | No | No  | No | Yes | Yes | Yes  | Change Health care Systems | Yes | No | No           | Not assessed | Not assessed |
| Sequist et al.,<br>2018  | United States | Physicians   | Chronic kidney disease | 1 year | Parallel RCT | 76 physicians and 3,913 patients in intervention arm, 77 physicians and 3,778 patients in control arm | Increase behavior frequency | No  | No  | No | No | Yes | No | No  | No  | Yes  | Epic                       | Yes | No | No           | Not assessed | Not assessed |
| Chak et al.,<br>2018     | United States | Not reported | Hepatitis B screening  | 1 year | Parallel RCT | 1,484 patients in intervention arm, 1,503 randomized in                                               | Increase behavior frequency | No  | No  | No | No | No  | No | No  | Yes | Epic | Yes                        | No  | No | Not assessed | Not assessed |              |



|                        |                |              |                              |                |              |                                                                                                       |                             |     |    |    |     |    |     |     |     |     |              |     |    |     |              |                                                                                                                                   |  |
|------------------------|----------------|--------------|------------------------------|----------------|--------------|-------------------------------------------------------------------------------------------------------|-----------------------------|-----|----|----|-----|----|-----|-----|-----|-----|--------------|-----|----|-----|--------------|-----------------------------------------------------------------------------------------------------------------------------------|--|
|                        |                |              |                              |                |              | control arm                                                                                           |                             |     |    |    |     |    |     |     |     |     |              |     |    |     |              |                                                                                                                                   |  |
| Tamblyn et al., 2018   | Canada         | Physicians   | Uncomplicated hypertension   | 60 months      | Parallel RCT | 38 physicians and 1,914 patients in intervention arm, 38 physicians and 1,678 patients in control arm | Increase behavior frequency | Yes | No | No | Yes | No | Yes | Yes | Yes | Yes | Not reported | Yes | No | Yes | Not reported | Having only one option to choose from, which prevents clinical judgment from being used to determine the best option for patients |  |
| Gulliford et al., 2019 | United Kingdom | Not reported | Upper respiratory infections | Not applicable | Cluster RCT  | 41 intervention clinics, 38 control clinics                                                           | Decrease behavior frequency | Yes | No | No | Yes | No | No  | No  | No  | Yes | Not reported | Yes | No | No  | Not assessed | Not assessed                                                                                                                      |  |
|                        |                |              |                              |                |              | Unknown number of clinicians in each arm                                                              |                             |     |    |    |     |    |     |     |     |     |              |     |    |     |              |                                                                                                                                   |  |

|                    |               |            |                 |                                                                                                                                                                                                                            |                                                                         |                                                                          |                             |    |    |    |     |    |    |    |    |     |              |     |    |    |              |              |
|--------------------|---------------|------------|-----------------|----------------------------------------------------------------------------------------------------------------------------------------------------------------------------------------------------------------------------|-------------------------------------------------------------------------|--------------------------------------------------------------------------|-----------------------------|----|----|----|-----|----|----|----|----|-----|--------------|-----|----|----|--------------|--------------|
| Zafar et al., 2019 | United States | Physicians | Lower back pain | The intervention period varied for each condition: Baseline- 8 months<br>Intervention period 1 with report cards for group 1 and CDS alerts for group 2- 10 months<br>Intervention period 2- 12 months both groups receive | Cross-over RCTs with average of 142.000 annual adult outpatient visits. | 8 PCP practice s with average of 142.000 annual adult outpatient visits. | Decrease behavior frequency | No | No | No | Yes | No | No | No | No | Yes | Not reported | Yes | No | No | Not assessed | Not assessed |
|--------------------|---------------|------------|-----------------|----------------------------------------------------------------------------------------------------------------------------------------------------------------------------------------------------------------------------|-------------------------------------------------------------------------|--------------------------------------------------------------------------|-----------------------------|----|----|----|-----|----|----|----|----|-----|--------------|-----|----|----|--------------|--------------|

reports  
cards  
and  
CDS  
alerts

|                     |               |            |              |                                 |              |                                                                                                                                           |                             |    |    |    |    |    |    |    |    |    |     |                       |     |    |    |              |              |
|---------------------|---------------|------------|--------------|---------------------------------|--------------|-------------------------------------------------------------------------------------------------------------------------------------------|-----------------------------|----|----|----|----|----|----|----|----|----|-----|-----------------------|-----|----|----|--------------|--------------|
| Weiner et al., 2020 | United States | Physicians | Hypoglycemia | Five-month follow-up assessment | Parallel RCT | 343 total clinicians: 1) intervention condition (123 clinicians, 3350 patients); and 2) control condition (220 clinicians, 3395 patients) | Increase behavior frequency | No | No | No | No | No | No | No | No | No | Yes | Regenstrief G3 system | Yes | No | No | Not assessed | Not assessed |
|---------------------|---------------|------------|--------------|---------------------------------|--------------|-------------------------------------------------------------------------------------------------------------------------------------------|-----------------------------|----|----|----|----|----|----|----|----|----|-----|-----------------------|-----|----|----|--------------|--------------|

|                    |               |                  |                        |                                     |             |                                                                                               |                             |     |    |    |    |    |    |    |    |     |                             |     |    |    |              |              |
|--------------------|---------------|------------------|------------------------|-------------------------------------|-------------|-----------------------------------------------------------------------------------------------|-----------------------------|-----|----|----|----|----|----|----|----|-----|-----------------------------|-----|----|----|--------------|--------------|
| McKie et al., 2020 | United States | Physicians, APPs | Cardiovascular disease | 7-day follow-up after patient visit | Cluster RCT | 20 care teams: 1) intervention condition (10 care teams; 55 clinicians); 2) control condition | Increase behavior frequency | Yes | No | No | No | No | No | No | No | Yes | General Electric Centricity | Yes | No | No | Not assessed | Not assessed |
|--------------------|---------------|------------------|------------------------|-------------------------------------|-------------|-----------------------------------------------------------------------------------------------|-----------------------------|-----|----|----|----|----|----|----|----|-----|-----------------------------|-----|----|----|--------------|--------------|

|                       |               |                 |                         |           |               |                                                                                                                                |                             |    |    |    |    |     |     |    |     |              |              |     |    |              |                                  |              |
|-----------------------|---------------|-----------------|-------------------------|-----------|---------------|--------------------------------------------------------------------------------------------------------------------------------|-----------------------------|----|----|----|----|-----|-----|----|-----|--------------|--------------|-----|----|--------------|----------------------------------|--------------|
|                       |               |                 |                         |           |               | n (10 care teams; 54 clinicians)                                                                                               |                             |    |    |    |    |     |     |    |     |              |              |     |    |              |                                  |              |
| Chak et al., 2020     | United States | Not reported    | Hepatitis B screening   | 3 years   | Parallel RCT  | Cohort 1: 1,542 intervention patients, 1,568 control patients<br>Cohort 2: 2,599 intervention patients, 2,590 control patients | Increase behavior frequency | No | No | No | No | No  | No  | No | No  | Yes          | Epic         | Yes | No | No           | Not assessed                     | Not assessed |
| Stephens et al., 2021 | United States | Physicians, NPs | Pediatric immunizations | 1 year    | Crossover RCT | Not reported                                                                                                                   | Increase behavior frequency | No | No | No | No | No  | No  | No | Yes | Not reported | Yes          | No  | No | Not reported | Concerns on accuracy of reminder |              |
| Campbell et al., 2021 | United States | Not reported    | Anticholinergics        | 12 months | Cluster RCT   | 254 patients in intervention arm, 298 patients in                                                                              | Decrease behavior frequency | No | No | No | No | Yes | Yes | No | No  | Yes          | Not reported | Yes | No | Yes          | Not assessed                     | Not assessed |

|                      |               |                      |                                     |           |               | control arm                                                                                                                                       |                             |     |     |    |     |    |    |     |     |     |              |     |     |     |              |              |
|----------------------|---------------|----------------------|-------------------------------------|-----------|---------------|---------------------------------------------------------------------------------------------------------------------------------------------------|-----------------------------|-----|-----|----|-----|----|----|-----|-----|-----|--------------|-----|-----|-----|--------------|--------------|
| Dhingra et al., 2021 | United States | Physicians, NPs, PAs | Musculoskeletal or neuropathic pain | 6 months  | Crossover RCT | Early Implementation: n=256 patients and 3 practices<br>Delayed Implementation: n=272 patients and 3 practices                                    | Increase behavior frequency | Yes | Yes | No | No  | No | No | No  | No  | Yes | Epic         | Yes | Yes | Yes | Not assessed | Not assessed |
| Kraemer et al., 2022 | United States | Not reported         | Musculoskeletal pain, headache      | 12 months | Cluster RCT   | 12 practice sites and 5,082 patients in control arm, 12 practice sites and 7,006 patients in arm with opioid justification, 12 practice sites and | Decrease behavior frequency | No  | No  | No | Yes | No | No | Yes | Yes | Yes | Not reported | Yes | No  | Yes | Not assessed | Not assessed |

5,704 patients in arm with clinician comparison, and 12 practices and 4,828 patients in arm with opioid justification and clinician comparison

|                     |               |              |                   |                 |               |                                                               |                             |     |    |    |     |    |    |    |    |    |     |              |     |    |    |              |              |
|---------------------|---------------|--------------|-------------------|-----------------|---------------|---------------------------------------------------------------|-----------------------------|-----|----|----|-----|----|----|----|----|----|-----|--------------|-----|----|----|--------------|--------------|
| Weiner et al., 2022 | United States | Physicians   | Not reported      | 6 months        | Parallel RCT  | 177 patients in intervention arm, 275 patients in control arm | Increase behavior frequency | No  | No | No | No  | No | No | No | No | No | Yes | Cerner, Epic | Yes | No | No | Not assessed | Not assessed |
| Lee et al., 2023    | United States | Not reported | Alcohol screening | 2 yrs, 7 months | Crossover RCT | 19 sites and 255,789 patients in usual care arm, the          | Increase behavior frequency | Yes | No | No | Yes | No | No | No | No | No | Yes | Not reported | Yes | No | No | Not assessed | Not assessed |

same 19 sites and 228,258 patients in intervention arm

Sigel et al., 2023 United States reported Not Firearm screening 3 years Paralel RCT 15 visits in control arm, 41 in intervention arm Increase behavior frequency Yes No No No No No No No No Yes Not reported Yes Yes No Not assessed Not assessed

Adusumalli et al., 2023 United States Physicians prescribing Statin 6 months Cluster RCT 7 clinics, 39 clinicians, and 1,032 patients in control arm Increase behavior frequency No No No Yes No No No No Yes Epic Yes No No Not assessed Not assessed

7 clinics, 44 clinicians, 1,181 patients in patient nudge arm

7 clinics, 32

clinician  
s, 981  
patients  
in  
clinician  
nudge  
arm

7 clinics,  
41  
clinician  
s, 937  
patients  
in  
patient  
and  
clinician  
nudge  
arm



**eTable 3.** Study quality assessment results

| Study                   | Randomization Process | Timing of Identification or Recruitment of Participants | Carryover Effects | Assignment to Interventions | Adhering to Interventions | Missing Outcome Data | Measurement of Outcome | Selection of Reported Result | Overall Risk of Bias |
|-------------------------|-----------------------|---------------------------------------------------------|-------------------|-----------------------------|---------------------------|----------------------|------------------------|------------------------------|----------------------|
| Adusumalli et al., 2023 | Low                   | Low                                                     | N/A               | Low                         | Low                       | Low                  | Low                    | Low                          | Low                  |
| Bell et al., 2010       | Some                  | Low                                                     | N/A               | Low                         | Some                      | Low                  | Low                    | Some                         | Some                 |
| Campbell et al., 2021   | Some                  | Low                                                     | N/A               | Low                         | Some                      | Low                  | Low                    | Some                         | Some                 |
| Co et al., 2010         | Low                   | Low                                                     | N/A               | Low                         | Some                      | Low                  | Low                    | Some                         | Some                 |
| Feder et al., 2011      | Low                   | Low                                                     | N/A               | Low                         | Some                      | Low                  | Low                    | Low                          | Some                 |
| Federman et al., 2017   | Some                  | Low                                                     | N/A               | Low                         | Some                      | Low                  | Low                    | Some                         | Some                 |
| Fiks et al., 2009       | Low                   | Low                                                     | N/A               | Low                         | Some                      | Low                  | Low                    | Some                         | Some                 |
| Fiks et al., 2013       | Low                   | Low                                                     | N/A               | Low                         | Some                      | Low                  | Low                    | Some                         | Some                 |
| Flottorp et al., 2002   | Low                   | Low                                                     | N/A               | Low                         | Some                      | High                 | Low                    | Some                         | High                 |
| Fortuna et al., 2009    | Some                  | Low                                                     | N/A               | Some                        | High                      | Low                  | Low                    | Low                          | High                 |
| Gill et al., 2009       | Some                  | Low                                                     | N/A               | Low                         | Some                      | Low                  | Low                    | Some                         | Some                 |
| Gill et al., 2011       | Low                   | Low                                                     | N/A               | Low                         | Some                      | Low                  | Low                    | Some                         | Some                 |
| Gulliford et al., 2019  | Low                   | Low                                                     | N/A               | Low                         | Some                      | Low                  | Low                    | Some                         | Some                 |
| Hoye et al., 2013       | Low                   | Low                                                     | N/A               | Low                         | Some                      | Low                  | Low                    | Some                         | Some                 |
| Karlsson et al., 2018   | Low                   | Low                                                     | N/A               | High                        | High                      | Low                  | Low                    | Some                         | High                 |
| Kharbanda et al., 2018  | Some                  | Low                                                     | N/A               | Low                         | Some                      | Low                  | Low                    | Some                         | Some                 |
| Kraemer et al., 2022    | Low                   | Low                                                     | N/A               | Low                         | Some                      | Low                  | Low                    | Some                         | Some                 |
| Kressin et al., 2016    | Some                  | Low                                                     | N/A               | Low                         | Some                      | Low                  | Low                    | Some                         | Some                 |
| Linder et al., 2009     | Low                   | Low                                                     | N/A               | Low                         | Some                      | Low                  | Low                    | Some                         | Some                 |
| Lo et al., 2009         | Some                  | Low                                                     | N/A               | Low                         | Some                      | Low                  | Low                    | Some                         | Some                 |
| McKie et al., 2020      | Some                  | Low                                                     | N/A               | Low                         | Some                      | Low                  | Low                    | Some                         | Some                 |
| Meeker et al., 2016     | Low                   | Low                                                     | N/A               | Low                         | Some                      | Low                  | Low                    | Some                         | Some                 |
| O'Connor et al., 2011   | Some                  | Low                                                     | N/A               | Low                         | Some                      | High                 | Low                    | Some                         | High                 |
| Player et al., 2010     | Low                   | Low                                                     | N/A               | Low                         | Some                      | Low                  | Low                    | Some                         | Some                 |
| Schriefer et al., 2009  | Low                   | Low                                                     | N/A               | Low                         | Some                      | Low                  | Low                    | Some                         | Some                 |
| Sequist et al., 2005    | Some                  | Low                                                     | N/A               | Low                         | Some                      | Low                  | Low                    | Some                         | Some                 |

|                        |      |     |      |      |      |      |     |      |      |
|------------------------|------|-----|------|------|------|------|-----|------|------|
| Szilagyi et al., 2015  | Some | Low | N/A  | Low  | Some | Low  | Low | Some | Some |
| Tamblyn et al., 2012   | Low  | Low | N/A  | Low  | Some | Low  | Low | Some | Some |
| Tamblyn et al., 2003   | Low  | Low | N/A  | Some | High | Low  | Low | Low  | High |
| Tang et al., 2012      | Low  | Low | N/A  | Low  | Some | Low  | Low | Some | Some |
| van Wyk et al., 2008   | Some | Low | N/A  | Low  | Some | Low  | Low | Some | Some |
| Wright et al., 2012    | Low  | Low | N/A  | Low  | Some | Low  | Low | Some | Some |
| Zera et al., 2015      | Some | Low | N/A  | Low  | Some | High | Low | Some | High |
| Palen 2006             | Low  | N/A | N/A  | High | High | Low  | Low | Some | High |
| Sequist 2012           | Low  | N/A | N/A  | Low  | Some | Low  | Low | Some | Some |
| Hsu 2013               | Low  | N/A | N/A  | Low  | Some | Low  | Low | Some | Some |
| Frank 2004             | Some | N/A | N/A  | Low  | Some | Low  | Low | Some | Some |
| Weiner 2020            | Low  | N/A | N/A  | Low  | Some | Low  | Low | Some | Some |
| Sequist 2018           | Low  | N/A | N/A  | Low  | Some | Low  | Low | Some | Some |
| Chak 2018              | Low  | N/A | N/A  | Low  | Some | Low  | Low | Some | Some |
| Tamblyn 2018           | Low  | N/A | N/A  | Low  | Some | Low  | Low | Some | Some |
| Guiriguet 2016         | Low  | N/A | N/A  | Low  | Some | Low  | Low | Some | Some |
| McDowell 1989          | Some | N/A | N/A  | Low  | Some | Low  | Low | Some | Some |
| Chak 2020              | Low  | N/A | N/A  | Low  | Some | Low  | Low | Some | Some |
| Abdel-Kader 2011       | Some | N/A | N/A  | Low  | Some | Low  | Low | Some | Some |
| Loo 2011               | Low  | N/A | N/A  | Low  | Some | Low  | Low | Some | Some |
| Sigel 2023             | Low  | N/A | N/A  | Low  | Some | Low  | Low | Some | Some |
| Weiner 2022            | Low  | N/A | N/A  | Low  | Some | Low  | Low | Low  | Some |
| Feldstein et al., 2006 | Low  | N/A | N/A  | Low  | Some | Low  | Low | Some | Some |
| Zafar 2019             | Low  | N/A | Low  | Low  | Some | High | Low | Some | High |
| Stockwell 2015         | Low  | N/A | High | Low  | Some | Low  | Low | Some | High |
| Dhingra 2021           | Some | N/A | Low  | Low  | Some | High | Low | Some | High |
| Stephens 2021          | Low  | N/A | High | Low  | Some | Low  | Low | Some | High |
| Lee 2023               | Low  | N/A | Low  | Low  | Some | Low  | Low | Low  | Some |
