# Supplementary material for: Electronic Health Record Nudges and Health Care Quality and Outcomes in Primary Care: A Systematic Review
Source: PubMed Central journal article supplement (PMC11409160; doi:10.1001/jamanetworkopen.2024.32760), 2024-09-17
Supplement: jamanetwopen-e2432760-s002.pdf [file jamanetwopen-e2432760-s002.pdf]

## Data Sharing Statement

Nguyen. Electronic Health Record Nudges and Health Care Quality and Outcomes in Primary Care. *JAMA Netw Open*. Published September 11, 2024.  
doi:10.1001/jamanetworkopen.2024.32760

### Data

**Data available:** No
